# Supplementary material
Source: HighWire-hosted journal article supplement (https://bmjopen.bmj.com/content/8/1/e017153)
Supplement: inline-supplementary-material-1 [file inline-supplementary-material-1.pdf]

## Appendix 1: search in different databases

### Embase (Ovid)

- 1 exp basal ganglia cerebrovascular disease/ (589)
- 2 cerebrovascular disorders/ (28457)
- 3 exp intracranial arterial diseases/ (4033)
- 4 exp intracranial arteriovenous malformations/ (7627)
- 5 exp intracranial embolism/ and thrombosis/ (341)
- 6 exp intracranial hemorrhages/ (112672)
- 7 stroke/ (142289)
- 8 exp brain infarction/ (63904)
- 9 exp brain ischemia/ (146312)
- 10 exp carotid artery diseases/ (58463)
- 11 1 or 2 or 3 or 4 or 5 or 6 or 7 or 8 or 9 or 10 (435950)
- 12 (stroke\$ or cva or poststroke or post-stroke tw).af. (377113)
- 13 (cerebrovasc\$ or cerebral vascular tw).af. (258529)
- 14 (cerebral or cerebellar or brain\$ or vertebrobasilar tw).af. (2073620)
- 15 (infarct\$ or ish?emi\$ or thrombo\$ or emboli\$ or apoplexy tw).af. (1331966)
- 16 14 and 15 (190335)
- 17 (cerebral or brain tw).af. (427090)
- 18 (haemorrhage or hemorrhage or haematoma or hematoma or bleed\$ tw).af. (419811)
- 19 17 and 18 (51165)
- 20 exp hemiplegia/ or exp paresis/ (25724)
- 21 (hemipar\$ or paretic or paresis or hemipleg\$).tw. (27554)
- 22 Gait Disorders, Neurologic/ (186)
- 23 11 or 12 or 13 or 16 or 19 or 20 or 21 or 22 (736569)
- 24 exp Upper Extremity/ (298321)
- 25 (upper limb\$ or upper extremit\$ or arm or shoulder or hand or axilla or elbow\$ or forearm\$ or finger\$ or wrist\$).tw. (815222)
- 26 exp Lower Extremity/ (340988)
- 27 (lower lib\$ or lower extremit\$ or buttock\$ or foot or feet or hip or hips or knee or knees or leg or legs or thigh\$ or ankle\$ or heel\$ or toe or toes).tw. (587073)
- 28 24 or 25 or 26 or 27 (1454564)
- 29 acupuncture.mp. or acupuncture/ or auricular acupuncture/ or acupuncture needle/ (39351)
- 30 electroacupuncture.mp. or electroacupuncture/ (5962)
- 31 29 or 30 (41050)
- 32 23 and 28 and 31 (352)
- 33 controlled clinical trial/ or randomized control.mp. (463239)
- 34 human/ (18118592)
- 35 32 and 33 and 34 (100)

### Medline (Ovid)

- 1 ((cerebrovascular disorders/ or exp basal ganglia cerebrovascular disease/ or exp brain ischemia/ or exp carotid artery diseases/ or exp intracranial arterial diseases/ or exp intracranial arteriovenous malformations/ or exp intracranial

- embolism/) and thrombosis/) or exp intracranial hemorrhages/ or stroke/ or exp brain infarction/ (174619)
- 2 (stroke\$ or cva or poststroke or post-stroke).tw. (184045)
  - 3 (cerebrovasc\$ or cerebral vascular).tw. (48126)
  - 4 (cerebral or cerebellar or brain\$ or vertebrobasilar).tw. (1080871)
  - 5 (infarct\$ or isch?emi\$ or thrombo\$ or emboli\$ or apoplexy).tw. (802321)
  - 6 4 and 5 (112916)
  - 7 (cerebral or brain).tw. (1000104)
  - 8 (haemorrhage or hemorrhage or haematoma or hematoma or bleed\$).tw. (299810)
  - 9 7 and 8 (38074)
  - 10 exp hemiplegia/ or exp paresis/ (18750)
  - 11 (hemipar\$ or paretic or paresis or hemipleg\$).tw. (19881)
  - 12 Gait Disorders, Neurologic/ (5535)
  - 13 1 or 2 or 3 or 6 or 9 or 10 or 11 or 12 (394414)
  - 14 exp Upper Extremity/ (155762)
  - 15 (upper limb\$ or upper extremit\$ or arm or shoulder or hand or axilla or elbow\$ or forearm\$ or finger\$ or wrist\$).tw. (603271)
  - 16 exp Lower Extremity/ (156126)
  - 17 (lower limb\$ or lower extremit\$ or buttock\$ or foot or feet or hip or hips or knee or knees or leg or legs or thigh\$ or ankle\$ or heel\$ or toe or toes).tw. (459027)
  - 18 14 or 15 or 16 or 17 (1120852)
  - 19 Acupuncture Therapy/ or Acupuncture/ or Acupuncture Points/ or Acupuncture, Ear/ or acupuncture.mp. (25001)
  - 20 electroacupuncture.mp. or Electroacupuncture/ (4748)
  - 21 19 or 20 (26152)
  - 22 13 and 18 and 21 (183)
  - 23 Random Allocation/ or Treatment Outcome/ or randomized control.mp. or Clinical Trials as Topic/ (1070629)
  - 24 Humans/ (17431024)
  - 25 22 and 23 and 24 (71)

## **Cochrane Library**

- 1 "Cerebrovascular Disorders" or "Brain Ischemia" or "Cerebral Hemorrhage" or "Stroke" "Cerebrovascular" or "Cerebrovascular Disorder" or "cva"
- 2 MeSH descriptor: [Cerebrovascular Disorders] this term only
- 3 MeSH descriptor: [Brain Ischemia] this term only
- 4 MeSH descriptor: [Cerebral Hemorrhage] explode all trees
- 5 MeSH descriptor: [Stroke] explode all trees
- 6 1 or 2 or 3 or 4 or 5
- 7 "acupuncture" or "electroacupuncture" or "electroacupuncture":ti,ab,kw (Word variations have been searched)
- 8 MeSH descriptor: [Acupuncture] explode all trees
- 9 MeSH descriptor: [Acupuncture Therapy] this term only
- 10 MeSH descriptor: [Electroacupuncture] explode all trees
- 11 7 or 8 or 9 or 10
- 12 6 and 11
- 13 Upper Extremity:ti,ab,kw (Word variations have been searched)
- 14 Lower Extremity:ti,ab,kw (Word variations have been searched)
- 15 MeSH descriptor: [Motor Activity] explode all trees

- 16 13 or 14 or 15
- 17 12 and 16
- 18 human
- 19 17 and 18
- 20 randomized control
- 21 19 and 20

## **CNKI**

主题=脑卒中 or 主题=中风 or 主题=脑梗死 or 主题=脑出血 or 主题=脑血管病 or 主题=脑血管障碍 and 主题=运动障碍 or 主题=运动功能 or 主题=偏瘫 and 主题=电针 and 主题=随机 or 主题=对照 and (模糊匹配)

## **VIP**

(K=卒中 OR K=中风 OR K=脑梗死 OR K=脑出血 OR K=脑血管病 OR K=脑血管障碍) AND K=电针 AND (K=运动功能 OR K=运动障碍 OR K=偏瘫)

## **CBM**

(((((("卒中"[不加权:扩展]) OR "中风"[不加权:扩展]) OR "脑梗死"[不加权:扩展]) OR "脑出血"[不加权:扩展]) OR "脑血管障碍"[不加权:扩展]) AND "运动障碍"[不加权:扩展]) OR "偏瘫"[不加权:扩展]) AND "电针"[不加权:扩展] AND "随机对照试验"[不加权:扩展])
